# Supplementary material for: A Model for Using a Concept Inventory as a Tool for Students' Assessment and Faculty Professional Development
Source: Atypon-hosted journal article supplement (doi:10.1187/cbe.10-05-0069), 2010-12-01
Supplement: supp_matt_a.pdf [file supp_matt_a.pdf]

Appendix A. Curriculum matrix for BSCI422 (Immunology lecture)

| Question | Concepts    | Assumed prior knowledge | Level of coverage (0=not at all; 1=briefly; 2=moderately; 3=detailed) | Percentage of correct responses (Spring 2009) |      |
|----------|-------------|-------------------------|-----------------------------------------------------------------------|-----------------------------------------------|------|
|          |             |                         |                                                                       | Pre                                           | Post |
| 1        | 12          | No                      | 3                                                                     | 54.8                                          | 67.7 |
| 2        | 3, 4, 10    | Yes                     | 0                                                                     | 16.1                                          | 22.6 |
| 3        | 2, 3        | Yes                     | 0                                                                     | 67.7                                          | 74.2 |
| 4        | 3, 4, 10    | Yes                     | 0                                                                     | 93.5                                          | 93.5 |
| 5        | 6           | Yes                     | 1/2                                                                   | 77.4                                          | 71.0 |
| 6        | 13          | No                      | 2/3                                                                   | 74.2                                          | 58.1 |
| 7        | 10          | Yes                     | 0                                                                     | 80.6                                          | 83.9 |
| 8        | 12          | No                      | 3                                                                     | 29.0                                          | 54.8 |
| 9        | 7, 1, 12    | No                      | 3                                                                     | 64.5                                          | 83.9 |
| 10       | 4, 5, 9, 12 | Yes                     | 2/1                                                                   | 80.6                                          | 87.1 |
| 11       | 8           | Yes                     | 1/0                                                                   | 38.7                                          | 45.2 |
| 12       | 3           | Yes                     | 1/0                                                                   | 74.2                                          | 67.7 |
| 13       | 7, 9        | Yes                     | 0                                                                     | 67.7                                          | 51.6 |
| 14       | 10          | Yes                     | 0                                                                     | 19.4                                          | 35.5 |
| 15       | 13          | No/yes                  | 3                                                                     | 77.4                                          | 77.4 |
| 16       | 9, 10       | Yes                     | 0                                                                     | 19.4                                          | 12.9 |
