# Supplementary material for: A Model for Using a Concept Inventory as a Tool for Students' Assessment and Faculty Professional Development
Source: Atypon-hosted journal article supplement (doi:10.1187/cbe.10-05-0069), 2010-12-01
Supplement: supp_matt_b.pdf [file supp_matt_b.pdf]

Appendix B. Background information for students who were enrolled in HPI courses during  
Fall2008-Spring 2009.

|                                        | Fall2008<br>BSCI223 | Fall2008<br>BSCI 380 | Fall2008<br>BSCI 424 | Spring2009<br>BSCI 223 | Spring2009<br>BSCI 412 | Spring2009<br>BSCI 417 | Spring2009<br>BSCI 422 |
|----------------------------------------|---------------------|----------------------|----------------------|------------------------|------------------------|------------------------|------------------------|
| Transferred from community college     | 28.3                | 22.2                 | 34                   | 25.2                   | 18.8                   | 41.7                   | 22.6                   |
| Transferred from four year institution | 25.2                | 38.9                 | 22                   | 25.2                   | 34.4                   | 16.7                   | 25.8                   |
| Started at UM                          | 46.5                | 38.9                 | 44                   | 49.5                   | 46.9                   | 41.7                   | 51.6                   |
| Male                                   | 31.4                | 55.6                 | 30                   | 20.6                   | 54.5                   | 25                     | 32.3                   |
| Female                                 | 68.6                | 44.4                 | 70                   | 79.4                   | 45.5                   | 75                     | 67.7                   |
| White                                  | 52.8                | 38.9                 | 32                   | 52.3                   | 45.5                   | 50                     | 64.5                   |
| Asian                                  | 26.4                | 38.9                 | 46                   | 29                     | 27.3                   | 33.3                   | 16.1                   |
| Black                                  | 10.7                | 5.6                  | 10                   | 4.7                    | 21.2                   | 16.7                   | 9.7                    |
| Less than 2 years in college           | 61                  | 16.7                 | 32                   | 62.6                   | 18.2                   | 16.7                   | 16.1                   |
| GPA 3 or higher                        | 73                  | 55.6                 | 68                   | 78.5                   | 60.6                   | 58.3                   | 74.2                   |
| CLFS majors                            | 40.9                | 94.4                 | 94                   | 49.5                   | 97                     | 100                    | 83.9                   |
